# Supplementary material for: Microcrystalline cellulose-derived porous carbons with defective sites for electrochemical applications
Source: Royal Society of Chemistry journal article supplement (doi:10.1039/c9ta05891e), 2019-01-01
Supplement: c9ta05891e1.pdf [file c9ta05891e1.pdf]

# Microcrystalline Cellulose-derived Porous Carbons with Defective Sites for Electrochemical Applications

Hao Lu,<sup>†</sup> Linzhou Zhuang,<sup>†</sup> Rohit Ranganathan Gaddam, Xiaoming Sun, Changlong Xiao, Timothy Duignan, Zhonghua Zhu and X. S. Zhao\*

School of Chemical Engineering, The University of Queensland, St Lucia, Brisbane, QLD 4072, Australia.

\*Correspondence to [george.zhao@uq.edu.au](mailto:george.zhao@uq.edu.au).

<sup>†</sup> These authors contributed equally to this work

## SC working electrode preparation process and performance calculation equations

For SCs, the working electrodes were prepared by mixing 75 wt% active materials, 20 wt% CB conductive additive and 5 wt% polytetrafluoro ethylene binder. Then the mixture was pressed onto a stainless-steel mesh or nickel foam and dried at 60 °C for 24 h.

The specific gravimetric capacitance of a single electrode measured in a three-electrode system,  $C_m$  (in F/g), was obtained according to the following equation

$$C_m = I \Delta t / mV \quad (1)$$

$C_m$  value derived from GCD in a two-electrode analysis was calculated from equation

$$C_m = 4I \Delta t / 2mV \quad (2)$$

The specific areal capacitance  $C_s$  (in mF/cm<sup>2</sup>) derived from GCD in a two-electrode analysis was calculated from equation

$$C_s = 4I \Delta t / 2SV \quad (3)$$

The energy and power density,  $E$  ( $Wh/Kg$ ) and  $P$  ( $kW/Kg$ ), of a SC cell were calculated from equations

$$E = 0.5C V^2 / 4 \times 3.6 \quad (4)$$

$$P = 3.6E / \Delta t \quad (5)$$

where,  $i$  is the instantaneous current response,  $V$  is the potential window,  $\Delta t$  is the discharge time,  $m$  is the mass and  $S$  is the geographic area of active materials on a single electrode.

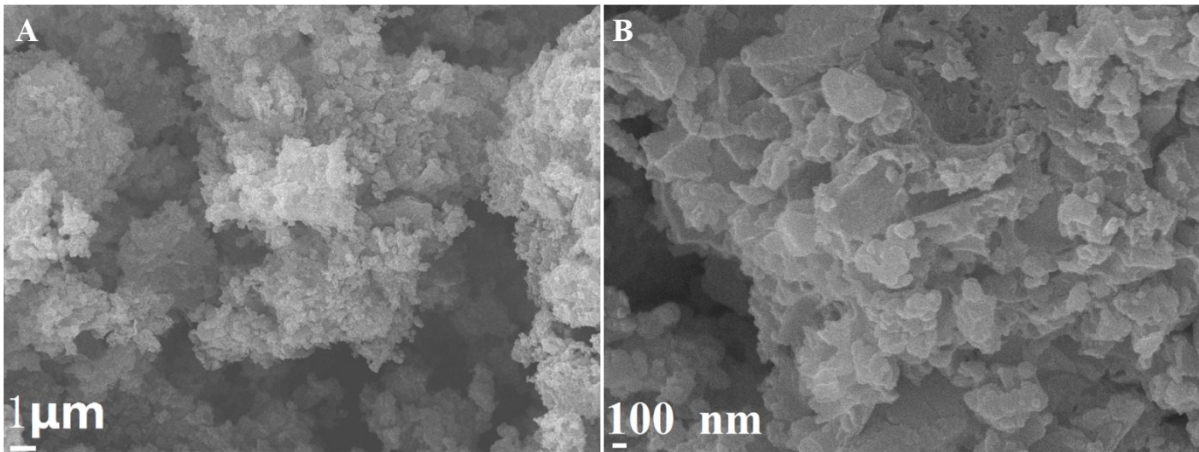

Fig. S1: FE-SEM images of the sample CNUY-600.

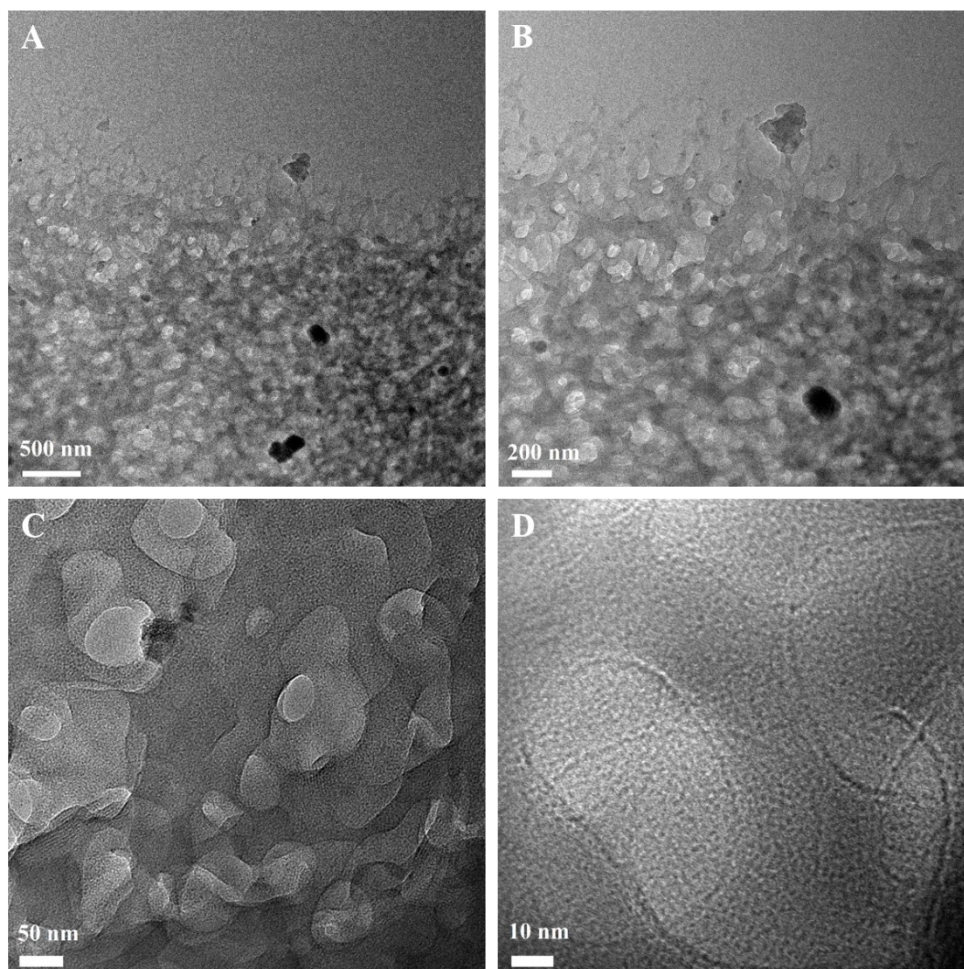

Fig. S2: TEM images of the sample CNUY-600.

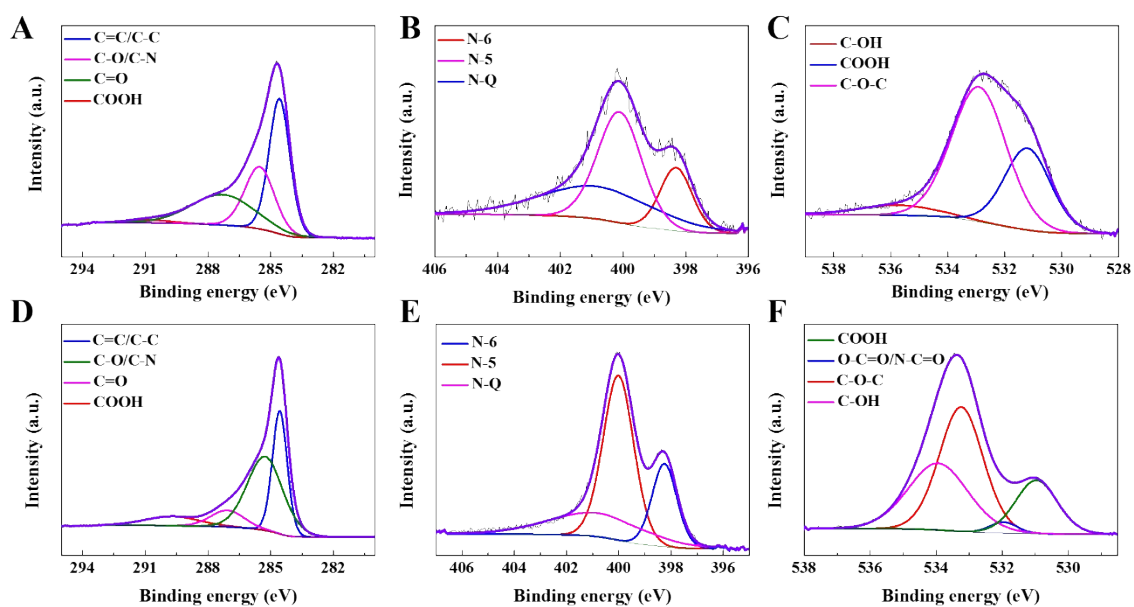

Fig. S3 The deconvoluted C 1s (A), N 1s (B), O 1s (C) spectra of sample CNUY-600H; The deconvoluted C 1s (D), N 1s (E), O 1s (F) spectra of CNUY-600.

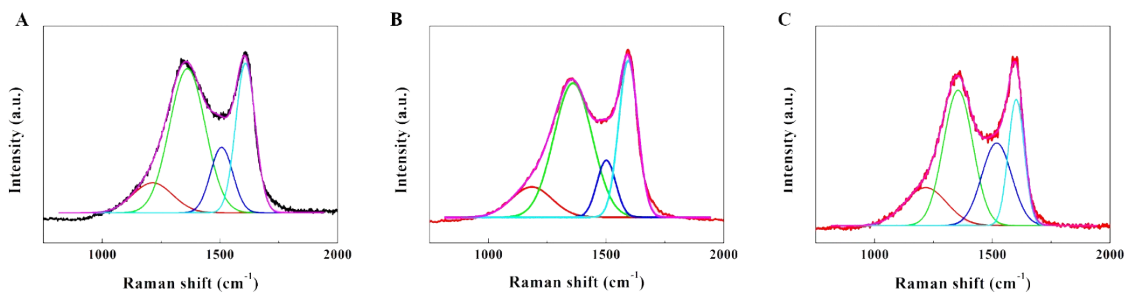

Fig. S4. Raman spectra of CNUY-600 (A), CNUY-600H (B) and CNUY-1100 (C) through Gaussian fitting. The  $I_G/I_D$  ratio of them is 1.03, 1.17 and 0.93, respectively.

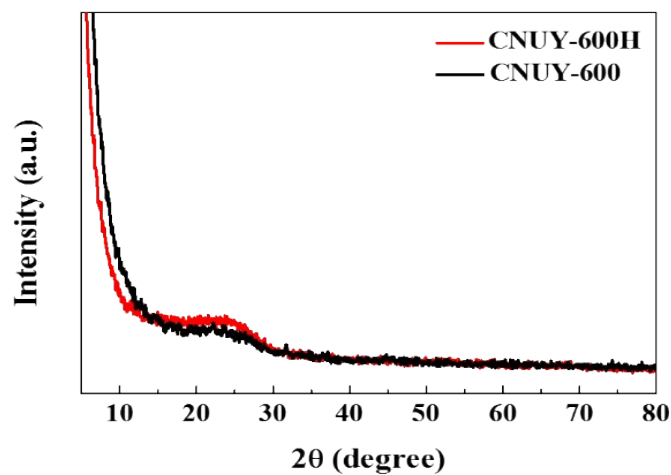

Fig. S5. XRD patterns of CNUY-600 and CNUY-600H.

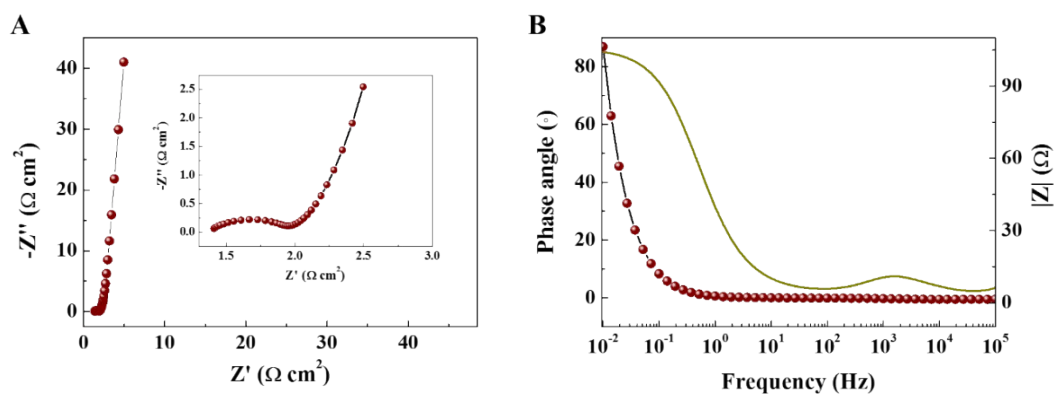

Fig. S6: The Nyquist plot (A) and Bode plots (B) of CNUY-600H measured in a three-electrode system with 1 M  $\text{H}_2\text{SO}_4$  as the aqueous electrolyte.

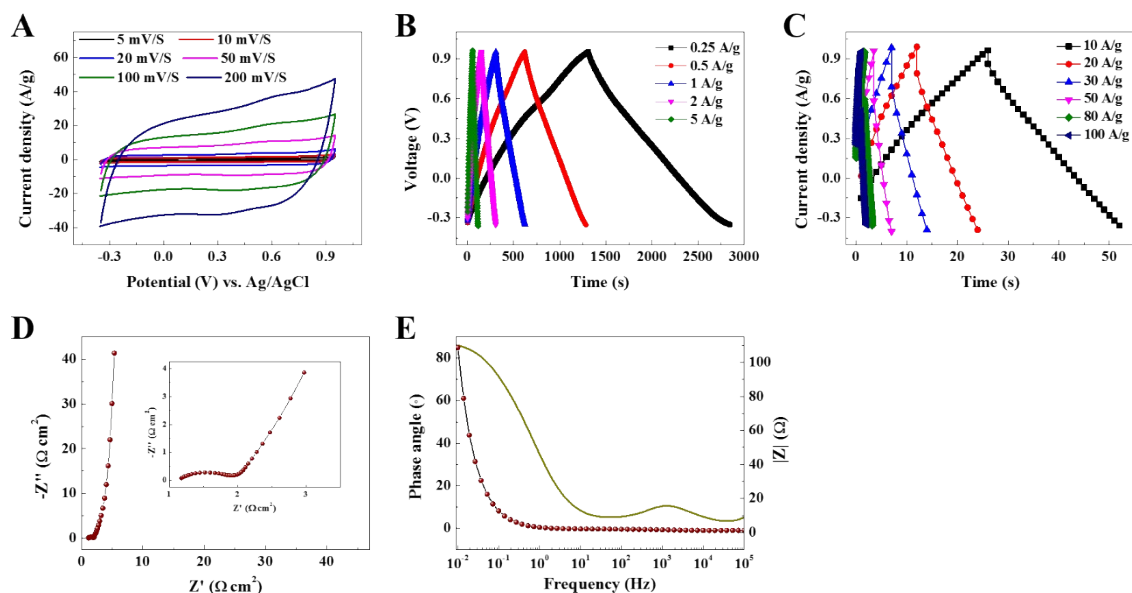

Fig. S7: The electrochemical performance of electrode CNUY-600 measured in a three-electrode system with 1 M  $\text{H}_2\text{SO}_4$  as the aqueous electrolyte: CV curves at scan rates ranging from 5 mV/s to 200 mV/s (A), GCD curves at current densities from 0.25 to 100 A/g (B, C), Nyquist plot (D) and Bode plots (E).

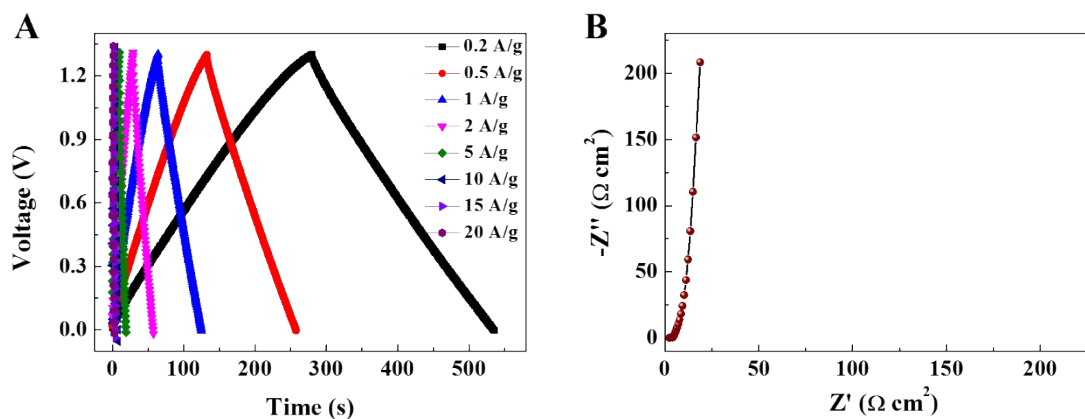

Fig. S8: The electrochemical performance of electrode CNUY-600 measured in a symmetric cell with 1 M  $\text{H}_2\text{SO}_4$  aqueous electrolyte: GCD curves at different current densities (A), Nyquist plot (B).

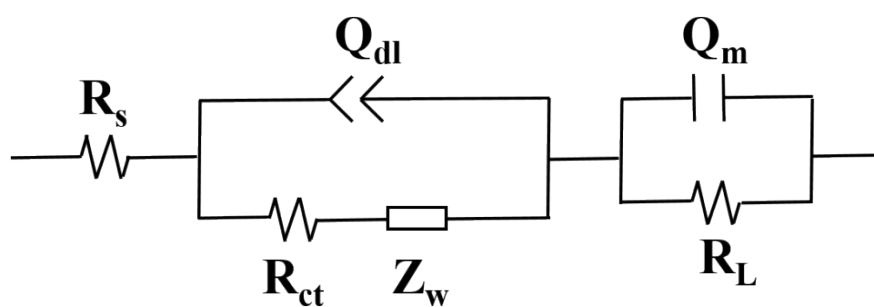

Fig. S9: The equivalent circuit used for fitting the Nyquist and Bode plots.

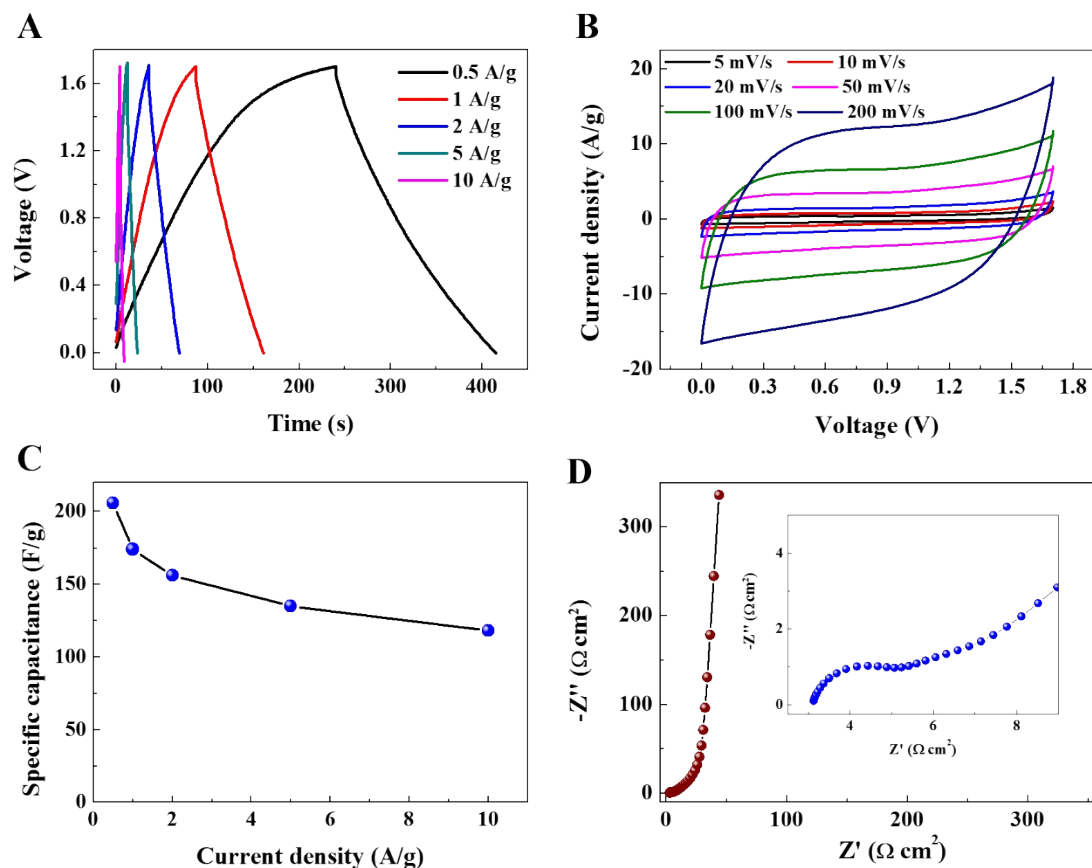

Fig. S10: The electrochemical performance of the electrode CNUY-600H measured in a symmetric cell with 1 M LiCl as the aqueous electrolyte: GCD curves at current densities ranging from 0.2 to 10 A/g (A), CV curves at scan rates from 5 to 200 mV/s (B), rate capability plot (C), Nyquist plot (D).

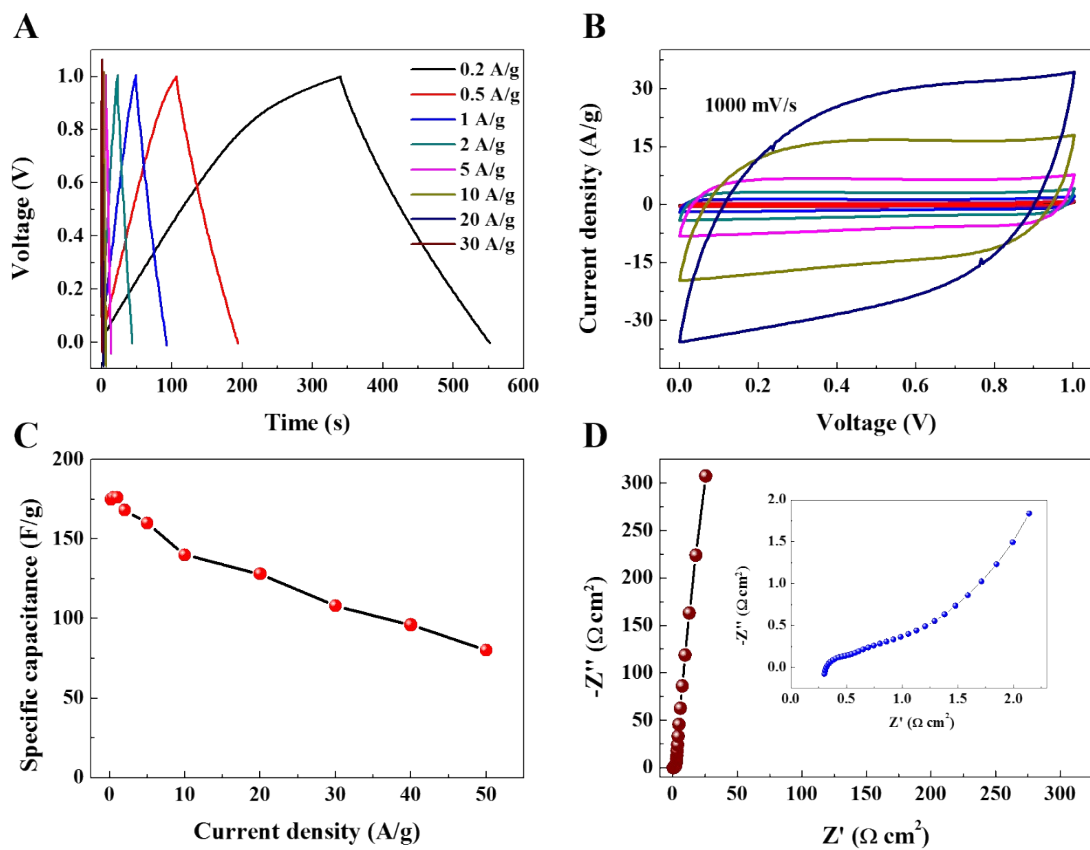

Fig. S11: The electrochemical performance of electrode CNUY-600H measured in a symmetric cell with 2 M KOH aqueous electrolyte: GCD curves at current densities ranging from 0.2 to 30 A/g (A), CV curves at scan rates from 5 to 1000 mV/s (B), rate capability plot (C), Nyquist plot (D).



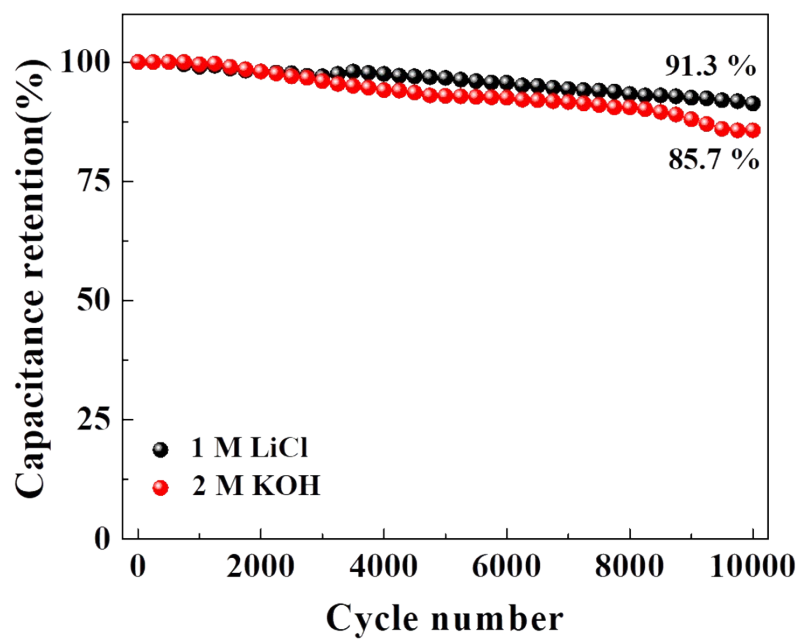

Fig. S12: Cycling performance of electrode CNUY-600H measured in a symmetric supercapacitor cell at a current density of 5A/g within 1 M LiCl and 2M KOH aqueous electrolyte.

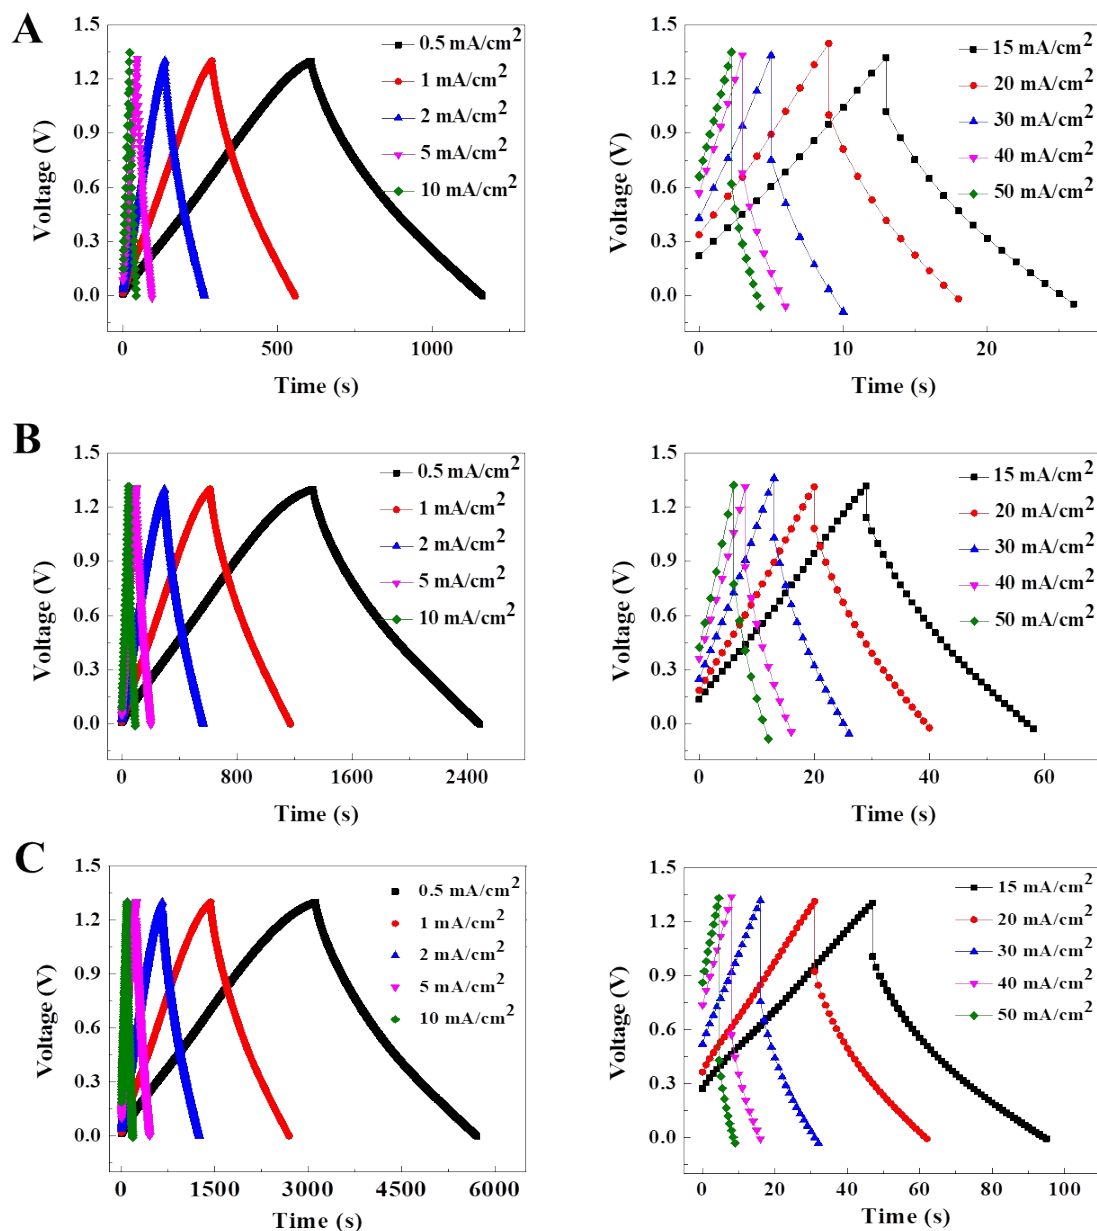

Fig. S13: GCD curves of electrode CNUY-600H with a mass loading of  $4 \text{ mg/cm}^2$  (A),  $8 \text{ mg/cm}^2$  (B) and  $20 \text{ mg/cm}^2$  (C) at different current densities measured in a symmetric supercapacitor cell within  $1 \text{ M H}_2\text{SO}_4$  aqueous electrolyte.

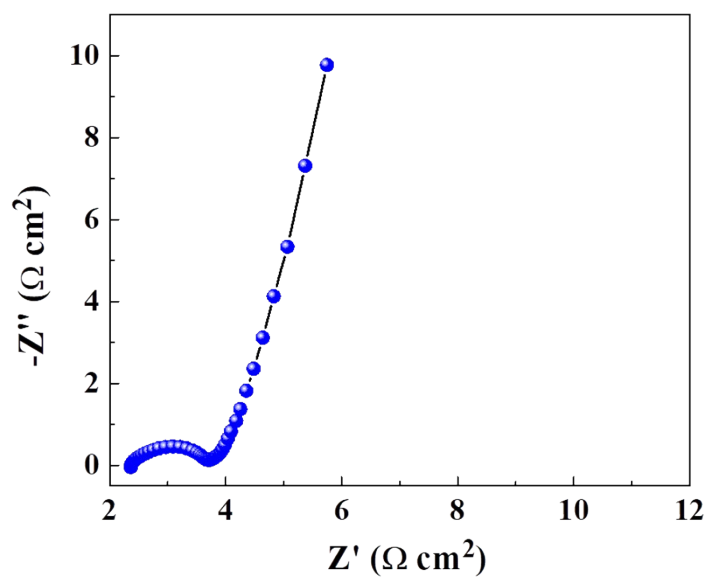

Fig. S14: Nyquist plot of electrode CNUY-600H with a mass loading of 20 mg/cm<sup>2</sup> measured in a symmetric cell within 1 M H<sub>2</sub>SO<sub>4</sub> aqueous electrolyte.

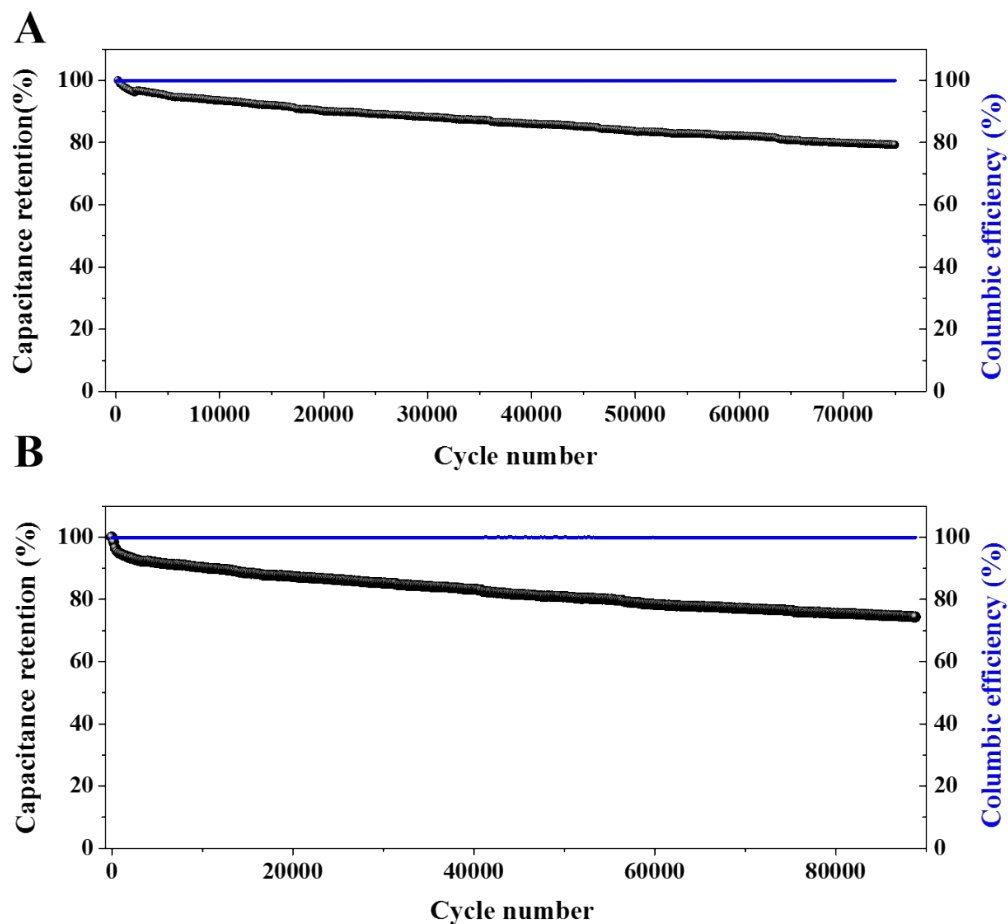

Fig. S15: Cycling performance of electrode CNUY-600H with a mass loading of 8 mg/cm<sup>2</sup> (A) and 12 mg/cm<sup>2</sup> (B) measured in a symmetric supercapacitor cell within 1 M H<sub>2</sub>SO<sub>4</sub> aqueous electrolyte.

8 mg/cm<sup>2</sup>: ~78 % of the initial areal capacitance value was maintained after 90000 cycles at a current density of 30 mA/cm<sup>2</sup>

12 mg/cm<sup>2</sup>: ~81 % and ~75% of the initial areal capacitance value was maintained after 50000 and 90000 cycles at a current density of 30 mA/cm<sup>2</sup> respectively.

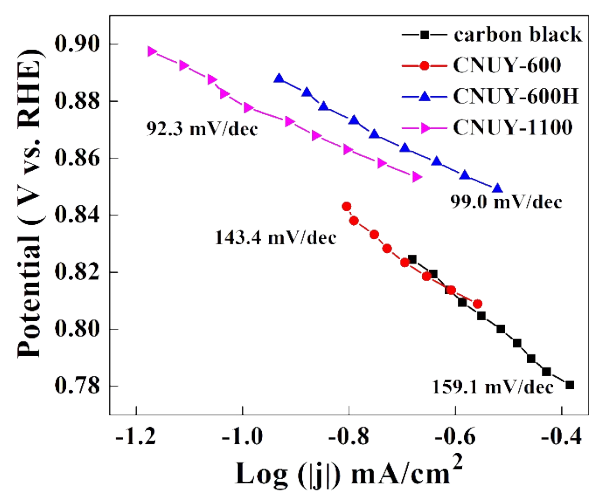

Fig. S16: Tafel plots of the samples used in this work.

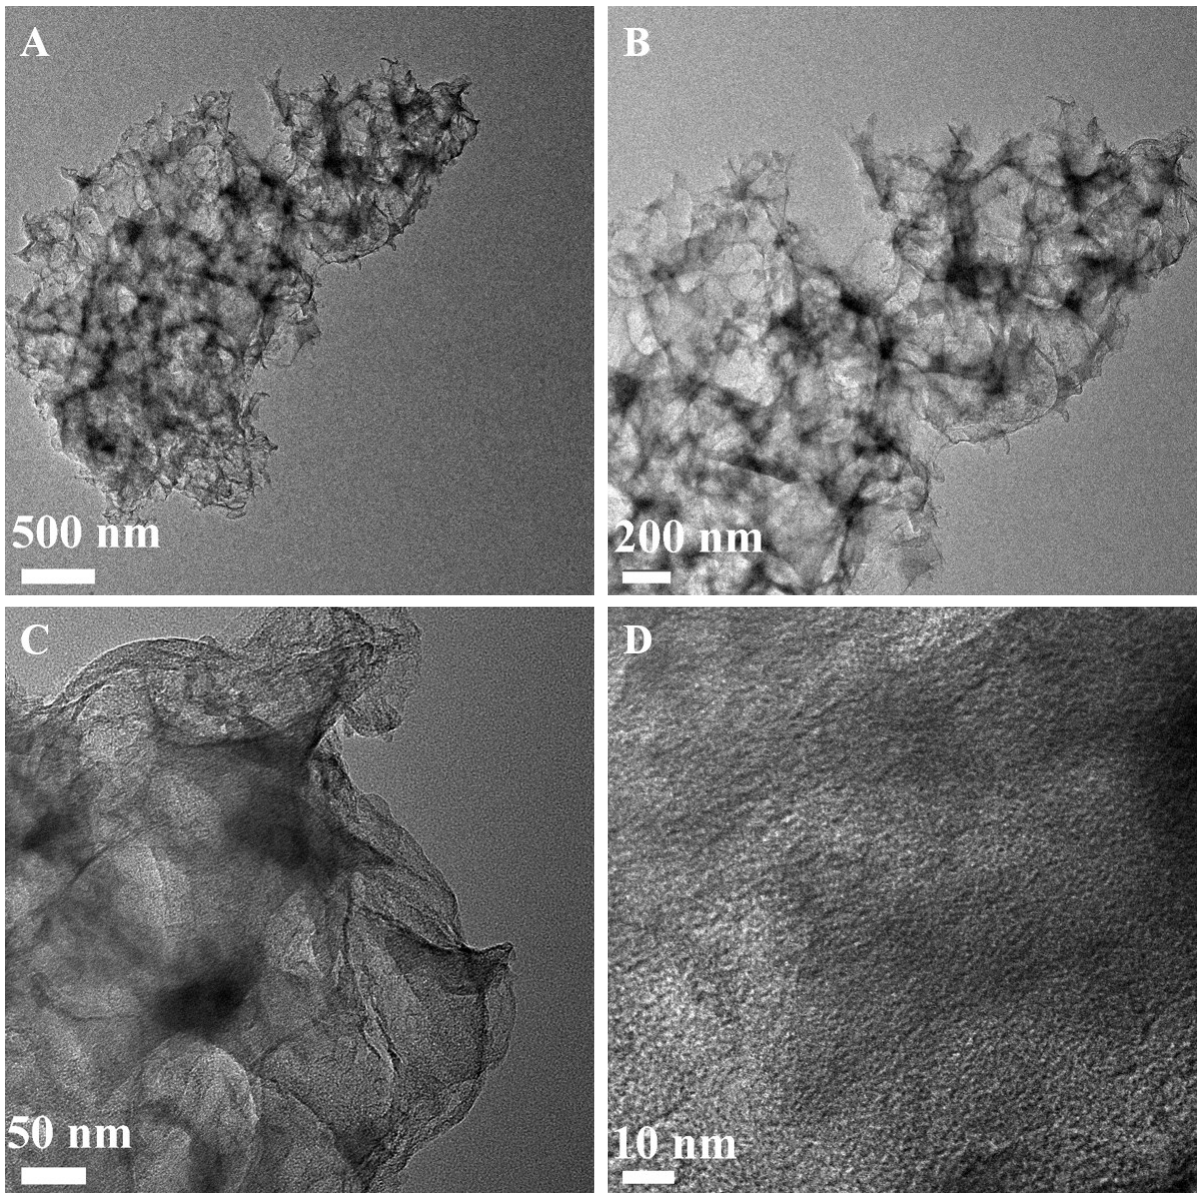

Fig. S17: TEM images of sample CNUY-1100.

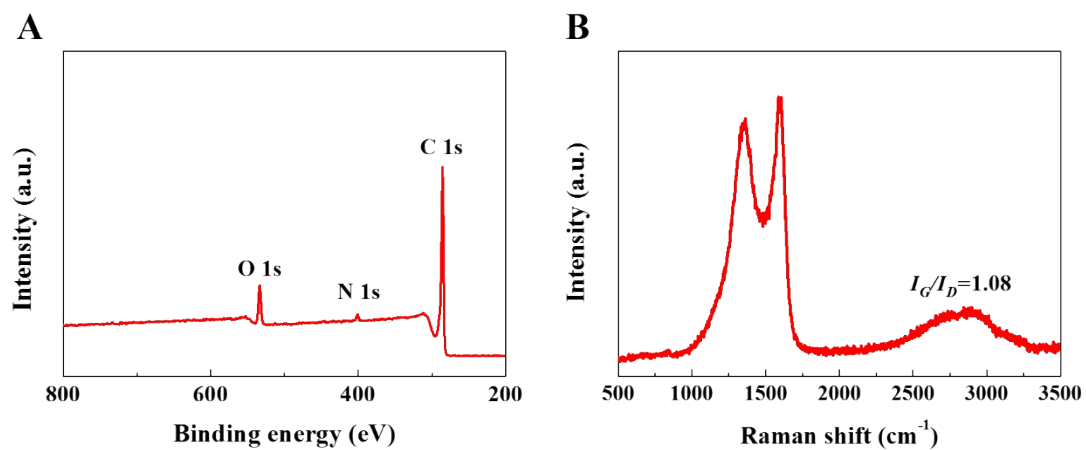

Fig. S18: XPS spectrum (A) and Raman spectra (B) of CNUY-1100

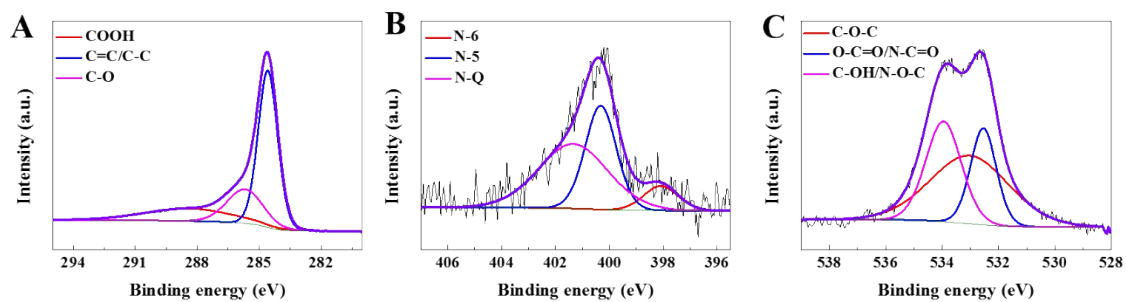

Fig. S19: The deconvoluted C 1s (A), N 1s (B), O 1s (C) spectra of sample CNUY-1100.

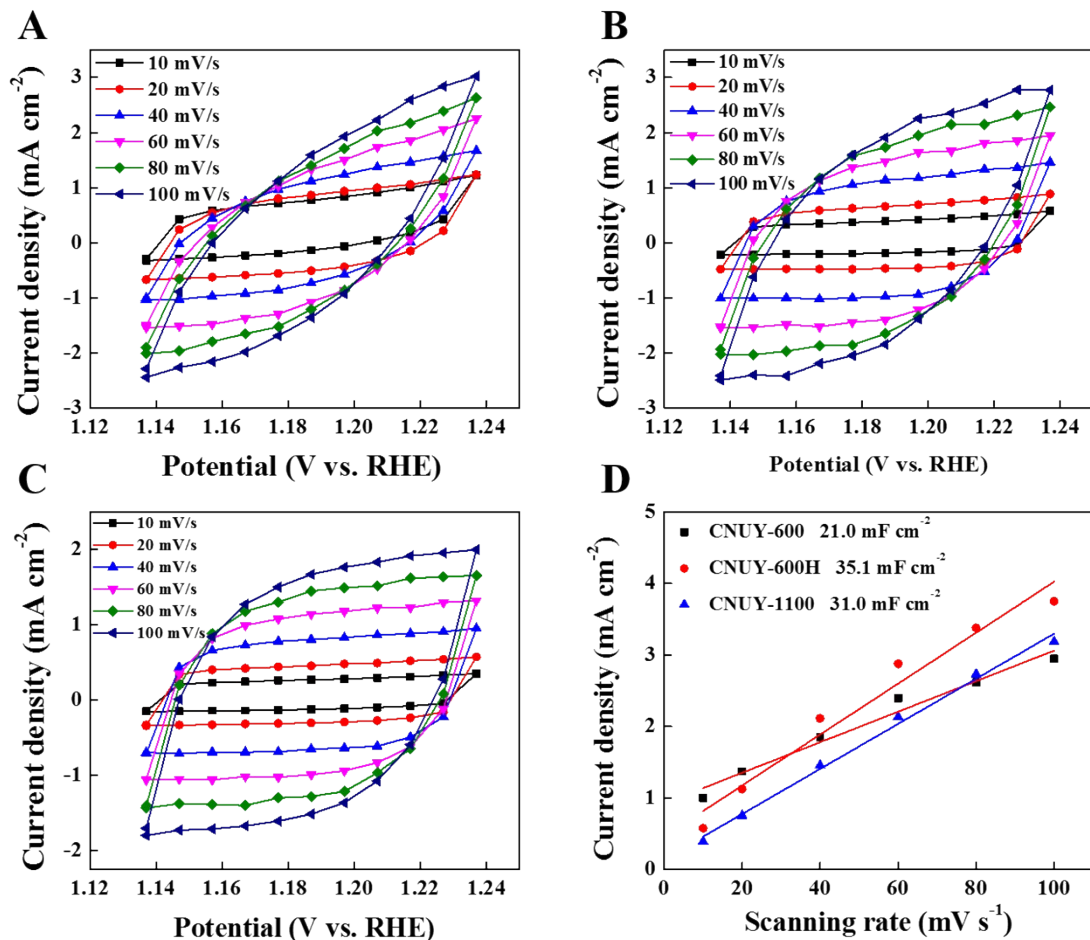

Fig. S20: CV curves of CNUY-600 (A), CNUY-600H (B) and CNUY-1100 (C) catalysts; their capacitive current measured at  $\sim 1.2$  V vs. RHE plotted as a function of scan rate (D).

Electrochemically active surface area (ECSA) of catalyst plays a crucial role in the reactions. To calculate the ECSA of CNUYs, we conducted CV at different scan rates with a potential window of 1.13~1.23 V vs RHE, where there is no Faradic current. The ECSA was estimated from the as obtained double-layer capacitance ( $C_{dl}$ ):

$$ECSA = C_{dl}/C_s \quad (6)$$

$C_s$  is the specific capacitance value for a flat standard with 1  $\text{cm}^2$  of real surface area.



The ECSAs of CNUYs were calculated to compare the active sites, as shown in Fig 6B. ECSA of CNUY-1100 is significantly larger than CNUY-600 but smaller than CNUY-600H. This is because the high temperature (1100°C) destroyed the pore structure to some extent (as shown in the TEM images in Fig. S13), leading to a smaller SSA thus smaller ECSA.

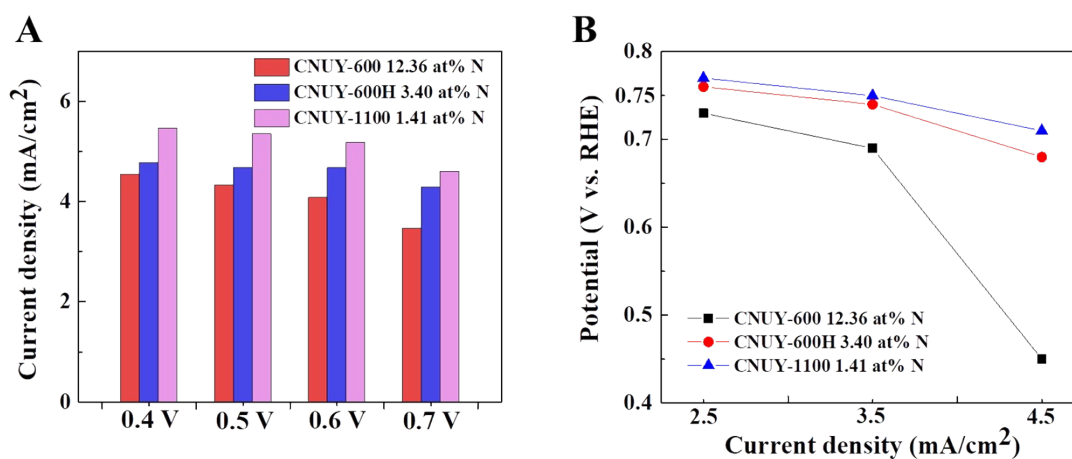

Fig. S21: ORR performance comparison of CNUYs: (A) current densities corresponding to certain potential and (B) potential corresponding to different current densities.

Table. S1 N 1s fitting results of CNUY-600 and CNUY-600H.

| Sample    | Nitrogen   |             |              |
|-----------|------------|-------------|--------------|
|           | Pyrrolic N | Pyridinic N | Quaternary N |
| CNUY-600  | 53.94 %    | 22.03 %     | 24.03 %      |
| CNUY-600H | 45.87 %    | 19.07 %     | 35.05 %      |

Table. S2 Specific capacitance values (in F/g) of electrodes CNUY-600 and CNUY-600H measured in a three-electrode system with 1 M H<sub>2</sub>SO<sub>4</sub> aqueous electrolyte

| Current density (A/g) | 0.25 | 0.5 | 1   | 2   | 5   | 10  | 20  | 30  | 50  | 80  | 100 |
|-----------------------|------|-----|-----|-----|-----|-----|-----|-----|-----|-----|-----|
| CNUY-600              | 295  | 255 | 244 | 237 | 220 | 200 | 184 | 161 | 134 | 97  | 80  |
| CNUY-600H             | 426  | 378 | 346 | 325 | 309 | 277 | 262 | 254 | 231 | 185 | 177 |

Table. S3 Electrochemical performance of electrode CNUY-600 measured in a two-electrode system with 1 M H<sub>2</sub>SO<sub>4</sub> as the aqueous electrolyte

| Current density (A/g)  | 0.2  | 0.5  | 1    | 2    | 5    | 10   | 15    | 20    |
|------------------------|------|------|------|------|------|------|-------|-------|
| C <sub>m</sub> (F/g)   | 196  | 192  | 187  | 175  | 146  | 123  | 97    | 80    |
| Energy density (Wh/Kg) | 11.5 | 11.3 | 10.9 | 10.3 | 8.6  | 7.2  | 6.8   | 4.7   |
| Power density (W/Kg)   | 162  | 325  | 643  | 1301 | 3259 | 6480 | 11657 | 13015 |

Table. S4 Electrochemical performance of electrode CNUY-600H measured in a two-electrode system with 1 M H<sub>2</sub>SO<sub>4</sub> as the aqueous electrolyte

| Current density (A/g)  | 0.2  | 0.5  | 1    | 2    | 5    | 10   | 15   | 20    |
|------------------------|------|------|------|------|------|------|------|-------|
| C <sub>m</sub> (F/g)   | 253  | 234  | 228  | 216  | 200  | 185  | 167  | 148   |
| Energy density (Wh/Kg) | 14.9 | 13.7 | 13.4 | 12.7 | 11.7 | 10.9 | 9.8  | 8.7   |
| Power density (W/Kg)   | 131  | 325  | 652  | 1306 | 3240 | 6540 | 9800 | 13050 |

Table. S5 Electrochemical performance of electrode CNUY-600H in a symmetric cell with 1M LiCl as the aqueous electrolyte

|                        |      |      |      |      |      |
|------------------------|------|------|------|------|------|
| Current density (A/g)  | 0.5  | 1    | 2    | 5    | 10   |
| $C_m$ (F/g)            | 206  | 174  | 156  | 135  | 118  |
| Energy density (Wh/Kg) | 20.7 | 17.5 | 15.7 | 13.6 | 11.9 |
| Power density (W/Kg)   | 426  | 851  | 1713 | 4451 | 9520 |

Table. S6 Specific capacitance values of electrode CNUY-600H in a symmetric cell with 2 M KOH as the aqueous electrolyte

|                       |     |     |     |     |     |     |     |     |    |    |
|-----------------------|-----|-----|-----|-----|-----|-----|-----|-----|----|----|
| Current density (A/g) | 0.2 | 0.5 | 1   | 2   | 5   | 10  | 20  | 30  | 40 | 50 |
| $C_m$ (F/g)           | 176 | 176 | 175 | 168 | 160 | 140 | 128 | 108 | 96 | 80 |

Table. S7 Areal capacitance values ( $\text{mF}/\text{cm}^2$ ) of electrode CNUY-600H of different mass loadings measured in a two-electrode system with 1 M  $\text{H}_2\text{SO}_4$  as the aqueous electrolyte.

|                                             |      |      |      |      |      |      |      |      |      |      |
|---------------------------------------------|------|------|------|------|------|------|------|------|------|------|
| Current density ( $\text{mA}/\text{cm}^2$ ) | 0.5  | 1    | 2    | 5    | 10   | 15   | 20   | 30   | 40   | 50   |
| 1 ( $\text{mg}/\text{cm}^2$ )               | 243  | 228  | 223  | 210  | 200  | 185  | 162  | 136  | 116  | 74   |
| 4 ( $\text{mg}/\text{cm}^2$ )               | 854  | 831  | 800  | 724  | 647  | 600  | 554  | 462  | 370  | 308  |
| 8 ( $\text{mg}/\text{cm}^2$ )               | 1775 | 1713 | 1661 | 1523 | 1416 | 1339 | 1231 | 1150 | 985  | 923  |
| 12 ( $\text{mg}/\text{cm}^2$ )              | 2518 | 2465 | 2338 | 2246 | 2000 | 1846 | 1723 | 1569 | 1354 | 1128 |
| 20 ( $\text{mg}/\text{cm}^2$ )              | 3988 | 3877 | 3662 | 3246 | 2779 | 2308 | 1908 | 1477 | 985  | 693  |

Table. S8 Comparison of samples studied in this work.

|                                                  | CNUY-600       |                | CNUY-600H     |               | CNUY-1100     |               |
|--------------------------------------------------|----------------|----------------|---------------|---------------|---------------|---------------|
|                                                  | 12.36<br>at% N | 22.39<br>at% O | 3.40<br>at% N | 7.43<br>at% O | 1.41<br>at% N | 6.66<br>at% O |
| Specific capacitance (F/g, 0.25 A/g)             | 295            |                | 426           |               | 93.3          |               |
| Specific capacitance (F/g, 100 A/g)              | 80             |                | 177           |               | -             |               |
| Onset potential (V vs. RHE)                      | 0.82           |                | 0.88          |               | 0.90          |               |
| Half-wave potential (V vs. RHE)                  | 0.72           |                | 0.77          |               | 0.77          |               |
| Limiting diffusion current (mA/cm <sup>2</sup> ) | 4.59           |                | 4.75          |               | 5.44          |               |

Table. S9 Comparison of cellulose-derived carbon materials as symmetric SC electrodes

| Precursor                  | Specific capacitance (F/g) | Measurement conditions     | Electrolyte                         | Ref.      |
|----------------------------|----------------------------|----------------------------|-------------------------------------|-----------|
| Cellulose filter paper     | 120                        | 1 A/g                      | 2 M KOH                             | 1         |
| Bagasse-derived cellulose  | 142                        | 0.5 A/g                    | KOH/PVA Gel                         | 2         |
| Cellulose acetate          | 160                        | 0.5 A/g                    | 6 M KOH                             | 3         |
| Microcrystal cellulose     | 194                        | 0.2 A/g                    | 1 M NaCl                            | 4         |
| Paper cellulose            | 200                        | 20 $\mu$ A/cm <sup>2</sup> | 1 M H <sub>2</sub> SO <sub>4</sub>  | 5         |
| Nanofibrillated cellulose  | 81                         | 1 mV/s                     | Solid electrolyte                   | 6         |
| Cellulose nanofiber        | 207                        | 5 mV/s                     | H <sub>2</sub> SO <sub>4</sub> /PVA | 7         |
| Microcrystal cellulose     | 248                        | 0.1 A/g                    | 1 M H <sub>2</sub> SO <sub>4</sub>  | 8         |
| Cellulose/MnO <sub>2</sub> | 306                        | 10 mV/s                    | 1 M Na <sub>2</sub> SO <sub>4</sub> | 9         |
| Microcrystal cellulose     | 253                        | 0.2 A/g                    | 1 M H <sub>2</sub> SO <sub>4</sub>  | This work |

## References

1. W. Luo, B. Wang, C. G. Heron, M. J. Allen, J. Morre, C. S. Maier, W. F. Stickle and X. Ji, *Nano letters*, 2014, **14**, 2225-2229.
2. P. Hao, Z. Zhao, J. Tian, H. Li, Y. Sang, G. Yu, H. Cai, H. Liu, C. Wong and A. Umar, *Nanoscale*, 2014, **6**, 12120-12129.
3. L. Deng, R. J. Young, I. A. Kinloch, A. M. Abdelkader, S. M. Holmes, D. A. De Haro-Del Rio and S. J. Eichhorn, *ACS applied materials & interfaces*, 2013, **5**, 9983-9990.
4. C. Wang, X. Wang, H. Lu, H. Li and X. Zhao, *Carbon*, 2018, **140**, 139-147.
5. L. Hu, J. W. Choi, Y. Yang, S. Jeong, F. La Mantia, L.-F. Cui and Y. Cui, *Proceedings of the National Academy of Sciences*, 2009, **106**, 21490-21494.
6. F. Jiao, J. Edberg, D. Zhao, S. Puzinas, Z. U. Khan, P. Mäkie, A. Naderi, T. Lindström, M. Odén and I. Engquist, *Advanced Sustainable System*, 2018, **2**, 1700121.
7. K. Gao, Z. Shao, J. Li, X. Wang, X. Peng, W. Wang and F. Wang, *Journal of Materials Chemistry A*, 2013, **1**, 63-67.
8. H. Lu, X. Sun, R. R. Gaddam, N. A. Kumar and X. S. Zhao, *Journal of Power Sources*, 2017, **360**, 634-641.
9. L.M. Chen, H.Y. Yu, D.C. Wang, T. Yang, J. Yao, K. C. Tam, *ACS Sustainable Chem. Eng*, 2019, **7**, 11823-11831.
